# Supplementary material for: Targeted Sequencing of Cancer-Related Genes in Colorectal Cancer Using Next-Generation Sequencing
Source: PLoS One. 2013 May 21;8(5):e64271. doi: 10.1371/journal.pone.0064271 (PMC3660257; doi:10.1371/journal.pone.0064271)
Supplement: Table S1 — Gene list. (XLSX) [file pone.0064271.s002.xlsx]

## Sheet: Sheet1
AATK
ABL1
ABL2
ACVR2A
AKT1
AKT2
ALK
APC
ATM
AXIN2
BCL2
BCL9
BLM
BMPR1A
BRCA1
BRAF
BRCA2
BUB1B
BCL10
BRIP1
CARD11
CBL
CCND1
CDH1
CDK4
CDK6
CDKN1B
CDKN2A
CDX2
CEBPA
CHEK2
CREB1
CREBBP
CSF1
CSF1R
CSMD3
CTNNB1
CYLD
DCC
EGFR
ELK1
ELN
ENG
EP300
EPHA1
EPHB1
EPM2A
ERBB2
ERCC1
ERCC2
ERCC3
ERCC4
ERCC5
EWSR1
EXT1
EXT2
EZH2
FANCA
FANCC
FANCE
FANCF
FGFR1
FGFR3
FGFR2
FLI1
FLT3
FBXW7
FOXN1
FOXL2
GATA1
GATA2
GATA3
GNAS
GPC3
HIP1
HNF1A
HRAS
IDH1
IL21R
IL6ST
ITK
JAK1
JAK2
JAK3
KIT
KRAS
LCK
MAF
MAFB
MAP2K4
MDM2
MEN1
MET
MLH1
MLH3
MLL
MMP14
MPL
MSH2
MSH6
MUTYH
MUSK
MYC
MYCN
MYH11
MYH9
NEK11
NF1
NF2
NFKB2
NOTCH1
NPM1
NRAS
NTRK1
NTRK3
OBSCN
PALB2
PARP1
PDGFRA
PDGFRB
PHOX2B
PIK3CA
PIK3R1
PIM1
PLAG1
PML
PMS1
PMS2
PRDM16
PRKAR1A
PTGS2
PTEN
PTPN11
PTK7
RAD51L1
RAF1
RARA
RASSF1
RB1
RECQL4
REL
RET
ROR1
ROS1
RUNX1
RYR1
SH3GL1
SMAD2
SMAD4
SMARCB1
SMO
SPP1
SPTAN1
SRC
STAT1
STAT3
STK11
STK11IP
SUFU
SYK
TAF15
TAF1L
TEK
TGFBR1
TGFBR2
TGFA
TLX1
TLX3
TOP1
TOP2A
TP53
TRRAP
TSC1
TSC2
TTN
VHL
VEGFA
WAS
WHSC1
WRN
WT1
XPA
XPC
